# Supplementary material for: The representation of alkalinity and the carbonate pump from CMIP5 to CMIP6 Earth system models and implications for the carbon cycle
Source: Copernicus journal article supplement (doi:10.5194/bg-20-1195-2023), 2023-04-03
Supplement: Supplementary file 1 [file bg-20-1195-2023-supplement.zip]

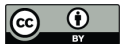

*Supplement of*

**The representation of alkalinity and the carbonate pump from CMIP5 to CMIP6 Earth system models and implications for the carbon cycle**

**Alban Planchat et al.**

*Correspondence to:* Alban Planchat ([alban.planchat@lmd.ipsl.fr](mailto:alban.planchat@lmd.ipsl.fr))

- [bg-20-1195-2023-supplement-title-page.pdf](#)
- [Table\\_S1\\_CMIP5-6\\_ESMs\\_Alk\\_CaCO3\\_Review.xlsx](#)

The copyright of individual parts of the supplement might differ from the article licence.
