# Supplementary material for: The representation of alkalinity and the carbonate pump from CMIP5 to CMIP6 Earth system models and implications for the carbon cycle
Source: Copernicus journal article supplement (doi:10.5194/bg-20-1195-2023), 2023-04-03
Supplement: Supplementary file 2 [file bg-20-1195-2023-supplement.zip]

Archive with 2 entries (2 files):
- Table_S1_CMIP5-6_ESMs_Alk_CaCO3_Review.xlsx
- bg-20-1195-2023-supplement-title-page.pdf
