# Supplementary material for: The representation of alkalinity and the carbonate pump from CMIP5 to CMIP6 Earth system models and implications for the carbon cycle
Source: Copernicus journal article supplement (doi:10.5194/bg-20-1195-2023), 2023-04-03
Supplement: Supplementary file 2 [file bg-20-1195-2023-supplement.zip › Table_S1_CMIP5-6_ESMs_Alk_CaCO3_Review.xlsx]

## Sheet: Review
ESM					Marine Biogeochemistry							Alkalinity														Salinity	CaCO3 cycle
																											Pelagic production					Benthic production	Sinking			Dissolution				Sediment interface			Saturation state
Group	CMIP	ESM name(s)	Country/Countries	ESM reference paper	Model name and version	Reference paper(s)	Relevant changes from this reference paper	Correspondance	Spatial resolution (longitude x latitude)	Vertical resolution	Redfield ratio (C/N/P) used for organic matter production and remineralisation	Spin-up of the biogeochemical model (years offline and/or years online)	Tuning	Initial conditions	Creation of the 3D DIC and Alk initialization fields from GLODAP (conversion from massic to volumetric units e.g. umol/kg to mol/m3) (1) use of a constant density (2) use of potential density (3) use of in situ density (4) N/A	Boundary conditions affecting Alk and/or DIC (river discharge, sediment mobilization, hydrothermal vents, atmospheric deposition)	Balance between Alk sources and sinks at equilibrium	Known drift and/or restoration?	Validation (database and methodology)	In the calculation of the carbonate system (e.g. aragonite/calcite saturation state calculation), does the model make any of the following assumptions: (1) potential T is equivalent to in situ T? (2) depth (m) is equivalent to pressure (dbar)? (Known to entail errors assessed in Orr and Epitalon, 2015)	Alkalinity components are taken into account in the calculation of the CO2 system (Orr and Epitalon, 2015) ? (1) carbonate alkalinity (2) borate alkalinity (3) water alkalinity (4) phosphoric acid alkalinity (5) silicic alkalinity	Nitrogen reactions (nitrification, N2-fixation, denitrification)	Do you consider that the soft tissue pump has an impact on Alk or not?	(1) Is an Alk and/or DIC content attributed to sea ice? (2) Does sea ice formation/melt affect salinity in the model? (3) Does sea ice block air-sea gas exchange in the model?		Comments (Initial conditions, known drift and/or restoration, validation)	Carbonate mineral (calcite and/or aragonite)	Explicit or implicit calcifying pkanton?	Types of phytoplankton(s) and/or zooplankton(s) it relies on	f(T, light, nutrients, Ω, phytoplankton, zooplankton, others)?	Do you consider DMS emissions associated to CaCO3 production?	Yes or No?	Fall speed (explicit or implicit?)	Is PIC advected?	Feedback on organic matter (ballast and/or protection effect? others?)	Explicit or implicit?	Scheme	f(Ω, others)	Fraction associated with grazing inefficiency by zooplankton	Explicit or implicit burial?	Seafloor dissolution	f(Ω, others)	Is an approximation considered in the calculation of the saturation state? Is mocsy used to calculate it?
CCCma	CMIP5	CanESM2	Canada	Arora et al (2011)	CMOC	Zahariev et al. (2008)	None	jim.christian@ec.gc.ca	1.4°x0.9°	40 levels	106/16 (no P)	6,000 yr offline, 600 yr online	No	OCMIP2	(1) Use of a constant density: 1,025 kg/m3.	Implicitly parameterized river discharge (all the CaCO3 reaching the seafloor is buried and the equivalent loss of Alk at the bottom is reintroduced at the surface locally as a crude parameterization of river discharge). No atmospheric deposition.	Alk external sinks/sources are exactly balanced.	No restoration.	Comparison with GLODAP.	(1) Yes (2) Yes	Carbonate chemistry calculated via OCMIP2 protocol. (1) globally model tracer (2) function of salinity (3) function of input tracers	N2-fixation exactly balanced by parameterized denitrification; Alk sources and sinks associated with these reactions are accounted for.	Yes	(1) No (2) Yes (3) Yes		Very small salinity drift due to non-conservation in terrestrial cryosphere. No restoration.	Calcite	Implicit	None	f(POC, T)	No	No	Implicit (e-folding scale of 2700 m).	No	None	Implicit	Exponential decay of CaCO3 flux with depth with a length-scale of 2700 m.	_	_	Implicit	No	_	_
CCCma	CMIP6	CanESM5	Canada	Swart et al. (2019)	CMOC	Zahariev et al. (2008)	None	jim.christian@ec.gc.ca	1°x1° (1°x0.33°) in the equatorial region)	45 levels	106/16 (no P)	> 1000 yr (relatively ad hoc)	No	OMIP-BGC	(1) Use of a constant density: 1,025 kg/m3.	Implicitly parameterized river discharge (all the CaCO3 reaching the seafloor is buried and the equivalent loss of Alk at the bottom is reintroduced at the surface locally as a crude parameterization of river discharge). No atmospheric deposition.	Alk external sinks/sources are exactly balanced.	No restoration	Comparison with GLODAP.	(1) Yes (2) Yes	Carbonate chemistry calculated via mocsy routine. (1) globally model tracer (2) function of salinity (3) function of input tracers (4) globally model tracer (PO4=DIN/16) (5) from observations (OMIP-BGC)	N2-fixation exactly balanced by parameterized denitrification; Alk sources and sinks associated with these reactions are accounted for.	Yes	(1) No (2) Yes (3) Yes		Initialization: OMIP (WOA 2013). No meaningdul drift. No restoration.	Calcite	Implicit	None	f(POC, T)	No	No	Implicit (e-folding scale of 2700 m).	No	None	Implicit	Exponential decay of CaCO3 flux with depth.	_	_	Implicit	No	_	_
CCCma	CMIP6	CanESM5-CanOE	Canada	Swart et al. (2019)	CanOE	Christian et al. (2022)	None	jim.christian@ec.gc.ca	1°x1° (1°x0.33°) in the equatorial region)	45 levels	106/16 (no P)	> 1000 yr (relatively ad hoc)	No	OMIP-BGC	(1) Use of a constant density: 1,025 kg/m3.	Implicitly parameterized river discharge (the CaCO3 can be buried at the seafloor if Ω>1, and the equivalent loss of Alk at the bottom is reintroduced at the surface locally as a crude parameterization of river discharge). No atmospheric deposition.	Implicitely parameterized river discharge (the CaCO3 can be buried at the seafloor if Ω>1, and the equivalent loss of Alk at the bottom is reintroduced at the surface locally as a raw parameterization of river discharge).	No restoration	Comparison with GLODAP.	(1) Yes (2) Yes	Carbonate chemistry calculated via mocsy routine. (1) globally model tracer (2) function of salinity (3) function of input tracers (4) globally model tracer (PO4=DIN/16) (5) from observations (OMIP-BGC)	Prognostic N2-fixation and denitrification, imposed global conservation of total fixed N; Alk sources and sinks associated with these reactions are accounted for and Alk is globally conserved with respect to N-cycle processes.	Yes	(1) No (2) Yes (3) Yes		Initialization: OMIP (WOA 2013). No meaningdul drift. No restoration.	Calcite	Implicit	None	f(small phytoplankton (mortality), small zooplankton (mortality))	No	No	Explicit (constant: 20 m/d).	Yes	None	Explicit	Constant dissolution rate of detrital CaCO3 particles.	_	1	Explicit	Yes (CaCO3 dissolution at the seafloor in undersaturated waters).	f(Ω)	No approximation to calculate it and no use of mocsy.
CMCC	CMIP5	CMCC-CESM	Italy	Vichi et al. (2011)	BFM4	Vichi et al. (2011)	None	tomas.lovato@cmcc.it	2°x2° (0.5x0.5° in the equatorial region)	31 levels	reference: 106/16/1 (variable quota of C, N, P in organic matter and Phytoplanton)	100 yr offline, 100 yr online	No	Alk and DIC have been initialized from GLODAPv1.	(1) Use of a constant density: 1,028 kg/m3.	Climatological river discharge (using results from the Global Erosion Model (GEM) of Ludwig et al., 1996), accounting for DIC, Alk, N, P, Si. Freshwater fluxes computed by the river transport model over land. River discharges are distributed over the river mouth neighbouring marine region. No atmospheric deposition fluxes.	Alk external sources and sinks are not fully balanced.	No restoration.	Visual (GLODAPv1.	(1) Yes (2) Yes	Carbonate chemistry calculated via OCMIP2 protocol. (1) globally model tracer (2) function of salinity (3) function of input tracers (4) globally model tracer (5) globally model tracer	Nitrification and denitrification are considered in the ocean, without affecting Alk.	No	(1) No (2) Yes (3) Yes		Initialization: WOA2008. There was a marked drift in dissolved inorganic silicate. No restoration.	_	_	_	_	_	_	_	_	_	_	_	_	_	_	_	_	_
CMCC	CMIP6	CMCC-ESM2	Italy	Lovato et al. (2022)	BFM5.2	Vichi et al. (2011, 2013, 2020) and Lovato et al. (2022)	None	momme.butenschon@cmcc.it tomas.lovato@cmcc.it	1°x1° (0.33x0.33° in the equatorial region)	50 levels	reference: 106/16/1 (variable quota of C, N, P in organic matter and phytoplanton)	300 yr offline, 425 yr online	No	Alk and preindustrial DIC from GLODAPv2.	(3) Use in-situ density of model at pre-industrial physical conditions.	Climatological river discharge (using results from the GlobalNews2 of Mayorga et al., 2010), accounting for DIC, Alk, N, P, Si. Freshwater fluxes computed by the river transport model over land. River discharges are distributed over the river mouth neighbouring marine region. No atmospheric deposition fluxes.	Alk external sources and sinks of are not fully balanced.	No restoration.	Visual (GLODAPv2).	(1) No (2) No	Carbonate chemistry calculated via mocsy routines. (1) globally model tracer (2) function of salinity (3) function of input tracers (4) globally model tracer (5) globally model tracer	Nitrification and denitrification are considered in the ocean and affect Alk.	Yes	(1) No (2) Yes (3) Yes		Initialization: WOA2013. No significant drifts in the dissolved inorganic nutrients. No restoration.	Calcite	Implicit	A portion of the nanoflagellates functional group is assumed to be represented by calcifiers. Microzooplankton preys on this group.	f(nutrients, nanophytoplankton (mortality), microzooplankton (grazing))	No	No	Explicit (constant: 3 m/d).	Yes	None	Explicit	Dissolution rate (Morse and Berner, 1972).	f(Ω)	0.5	Explicit	No	_	We use calcite saturation from mocsy in the parameterization for calcite dissolution.
CNRM-CERFACS	CMIP5	CNRM-ESM1	France	Séférian et al. (2016)	PISCESv1	Aumont et al. (2005)	None	roland.seferian@meteo.fr	1°x1° (0.33x0.33° in the equatorial region)	42 levels	122/16/1	1300 yr online	No	Alk and DIC have been initialized from GLODAPv1.	(1) Use of a constant density: 1,028 kg/m3.	Fixed river discharge (using results from the Global Erosion Model (GEM) of Ludwig et al., 1996; containing Alk, DIC; nutrients (N) discharge also affecting Alk). River discharge is localized at river mouths. Freshwater fluxes from rivers are also considered. Fixed localized atmospheric deposition of nutrients (N) affecting Alk at the surface.	Alk sources (river discharge and atmospheric nutrient deposition) are exactly balanced by the sink associated with PIC burial at the seafloor. The fraction of PIC reaching the seafloor that is not buried is instantaneously redissolved in the last ocean grid cell.	A restoring toward the observed Alk global content is performed every year.	Visual validation with GLODAPv1 (maps and section), with a Taylor diagram and basic statistics.	(1) No (2) No	Carbonate chemistry calculated via OCMIP2 protocol. (1) globally model tracer (2) function of salinity (3) function of input tracers (4) globally model tracer (5) globally model tracer	Nitrification, N2-fixation and denitrification are considered in the ocean and affect Alk.	Yes	(1) No (2) Yes (3) Yes		Initialization: WOA2009. No known drift. No restoration.	Calcite	Implicit	Coccolithophores, mainly Emiliana huxleyi.	f(T, nutrients, nanophytoplankton (mortality), micro/mesozooplankton (grazing))	No	No	Explicit (variable: same speed as the large organic particles (GOC), between 50 m/d and 375 m/d).	Yes	Ballast effect (50% of the organic matter of the calcifiers is assumed to be associated with the shell, which infers that 50% of the biomass of the dying calcifiers is routed to the fast sinking particles). The feedback on organic matter is negligible though, since it only concerns the small organic particles (POC) produced by the nanophytoplankton group whereas most of the export is associated t…	Explicit	Dissolution rate in undersaturated waters (0.03 /d based on Maier-Reimer, 1993).	f(CO3, CO3_sat, K_PIC)	0.15 (fraction of calcite dissolved in micro/mesozooplankton guts: 0.5, based on Jansen and Wolf-Gladrow, 2001).	Implicit	Yes (the CaCO3 flux reaching the last model box that is not buried is redissolved instantaneously).	_	Same formulation as now proposed in mocsy.
CNRM-CERFACS	CMIP6	CNRM-ESM2-1	France	Séférian et al. (2019)	PISCESv2-gas	Aumont et al. (2015)	N2O module (Martinez-Rey et al., 2015) DMS module (Masotti et al., 2016 and Bock at al., 2021).	roland.seferian@meteo.fr	1°x1° (0.33x0.33° in the equatorial region)	75 levels	122/16/1	1500y offline, 1100 yr online	Yes (Séférian et al., 2020 supplementary material).	Alk and DIC have been initialized from GLODAPv1.	(1) Use of a constant density: 1,028 kg/m3.	Fixed river discharge (DIC and Alk riverine inputs have been derived up from DOC riverine input from the Global Erosion Model (GEM) of Ludwig et al., 1996); a diagenetic metamodel has been used for calcite and organic matter as decribed in the reference paper; nutrients discharge (N) also affect Alk). River discharge is localized at river mouths. Freshwater fluxes from rivers are also considered.…	Alk external sources and sinks of are not fully balanced.	A restoring toward the observed Alk global content is performed every year only for the spin-up. Alk restoring is then stopped for all teh simulations.	Visual validation with GLODAPv2 (maps and section), with a Taylor diagram and basic statistics.	(1) No (2) No	Carbonate chemistry calculated via mocsy routine. (1) globally model tracer (2) function of salinity (Lee et al., 2010) (3) function of input tracers (4) globally model tracer (5) globally model tracer	Nitrification, N2-fixation and denitrification are considered in the ocean and affect Alk.	Yes	(1) No (2) Yes (3) Yes		Initialization: WOA2013. No known drift. No restoration.	Calcite	Implicit	Coccolithophores, mainly Emiliana huxleyi (Zondervan, 2007).	f(T, light, mixed layer depth, nutrients nanophytoplankton (mortality), micro/mesozooplankton (grazing))	No, but DMS is considered interactively in the model, computed from the carbon biomass of the two phytoplankton groups (Séférian et al., 2019).	No	Explicit (variable: same speed as the large organic particles (GOC), between 30 m/d and 200 m/d).	Yes	Ballast effect (50% of the organic matter of the calcifiers is assumed to be associated with the shell, which infers that 50% of the biomass of the dying calcifiers is routed to the fast sinking particles). The feedback on organic matter is negligible though, since it only concerns the small organic particles (POC) produced by the nanophytoplankton group whereas most of the export is associated t…	Explicit	Dissolution rate in undersaturated waters (0.197 /d).	f(Ω)	0.5 for microzooplankton and 0.75 for mesozooplankton.	Explicit	Yes (CaCO3 dissolution at the seafloor depending on saturation state thresholds, parameterization following Archer, 1996).	f(Ω), but a bug in the equation has been noted and addressed in recent release of the model.	mocsy
CSIRO	CMIP6	ACCESS-ESM1-5	Australia	Ziehn et al. (2020)	WOMBAT	Original WOMBAT description in Oke et al. (2013).	Updates to various WOMBAT parameterisations described in Law et al. (2017) and Ziehn et al. (2020).	matthew.chamberlain@csiro.au	1°x1° (0.33°x0.33° in the equatorial region, 0.4°x0.4° in the Southern Ocean south of 70°S)	50 levels	106/16/1	1000 yr online	Parameters updated from previous version (ESM1, Law et al. 2017); no further tuning.	Alk and DIC initialised with GLODAPv1	(1) Use of a constant density: 1,0245 kg/m3.	No river discharge, but freshwater discharge affects Alk. No atmospheric deposition.	No loss of Alk, only temporary storage in sediment. The PIC/POC in the sediments remineralize/dissolve at the same rate as in the water column. No burial.	No restoration.	Some visual validation of improved distributions of Alk, productivity, and other ocean-BGC tracers, with respect to previous version (ACCESS-ESM1), and almost zero flux in CO2, shown in Ziehn et al. (2020).	Saturation state not diagnosed within model.	Carbonate chemistry calculated via OCMIP2 protocol. (1) globally model tracer (2) function of salinity (3) function of input tracers (4) globally model tracer (5) SiO4 of 35.0 mmol/m3	_	Yes	(1) No (2) Yes (3) Yes		Initialization: WOA2005 No restoration. Drift in the average salinity is small, 8.8e-4 psu per century (Ziehn et al 2020).	Generic CaCO3 (shared as aragonite in the CMIP exercise).	Implicit	Generic phytoplankton (The global carbonate was aimed at being ~8% of the organic export following Yamanaka and Tajika, 1996).	f(phytoplankton (mortality), zooplankton (mortality, grazing))	No	No	Explicit (constant: 6 m/d).	Yes	None	Explicit	Constant dissolution rate of 0.001714 /d (sinking and dissolution rates to produce a lengthscale of 3500 m).	_	0.075	_	Yes (the CaCO3 flux reaching the last model box is temporary stored. It redissolves at the same rate as in the water column).	_	_
HAMMOZ-Consortium	CMIP6	MPI-ESM-1-2-HAM	Switzerland, Germany, UK and Finland	Mauritsen at al. (2019) and Neubauer et al. (2019)	HAMOCC6.2	Information not available	Information not available	Information not available	Information not available	Information not available	122/16/1	Information not available	Information not available	Information not available	Information not available	No river discharge of carbon and nutrients. Freshwater discharge from rivers affacts Alk. No atmospheric deposition affecting Alk.	Alk budget is not balanced.	No restoration.	Information not available	(1) No (2) No	Carbonate chemistry calculated via OCMIP2 protocol. (1) globally model tracer (2) function of salinity (3) function of input tracers (4) globally model tracer (5) globally model tracer	N2-fixation and denitrification affecting Alk	Yes	(1) No (2) Yes (3) Yes		Information not available	Calcite	Implicit	Ernst Maier-Reimer left us with the information…	f(SiOH4, phytoplankton (mortality), zooplankton (grazing, mortality))	No	No	Explicit (constant: 30 m/d).	No	None	Explicit	Dissolution rate in undersaturated waters (0.0075 /d).	f(Ω)	0.2 for herbivore zooplankton and 0.05 for carnivore zooplankton.	Explicit	Yes	see Heinze at al., 1999	Calculation of the solubility product of calcite for dissolution.
IPSL	CMIP5	IPSL-CM5A-LR IPSL-CM5A-MR IPSL-CM5B-LR	France	Dufresne et al. (2013)	PISCESv1	Aumont et al. (2005)	None	olivier.aumont@ird.fr	2°x2° (0.5x0.5° in the equatorial region)	31 levels	122/16/1	600 yr offline, 3000 yr online 300yr offline, 3000 yr online 600 yr offline, 3000 yr online	No	Alk and DIC have been initialized from GLODAPv1.	(1) Use of a constant density: 1,028 kg/m3.	Fixed river discharge (DIC and Alk riverine inputs have been derived up from DOC riverine input from the Global Erosion Model (GEM) of Ludwig et al., 1996); River discharge of nutrients is computer from DIC using a global scaling factor to match global estimates of N and P supply. A diagenetic metamodel has been used for calcite and organic matter as decribed in the reference paper; nutrient disc…	Alk sources (river discharge and atmospheric nutrient deposition) are exactly balanced by the sink associated with PIC burial at the seafloor. The fraction of PIC reaching the seafloor that is not buried is instantaneously redissolved in the last ocean grid cell.	A restoring toward the observed Alk global content is performed every year.	Visual validation with GLODAPv1 and with a Taylor diagram.	(1) No (2) No	Carbonate chemistry calculated via OCMIP2 protocol. (1) globally model tracer (2) function of salinity (3) function of input tracers (4) globally model tracer (5) globally model tracer	Nitrification, N2-fixation and denitrification are considered in the ocean and affect Alk.	Yes	(1) No (2) Yes (3) Yes		Initialization: WOA1998. No drift and no restoring.	Calcite	Implicit	Coccolithophores, mainly Emiliana huxleyi.	f(T, nutrients, nanophytoplankton (mortality), micro/mesozooplankton (grazing))	No	No	Explicit (variable: same speed as the large organic particles (GOC), between 50 m/d and 375 m/d).	Yes	Ballast effect (50% of the organic matter of the calcifiers is assumed to be associated with the shell, which infers that 50% of the biomass of the dying calcifiers is routed to the fast sinking particles). The feedback on organic matter is negligible though, since it only concerns the small organic particles (POC) produced by the nanophytoplankton group whereas most of the export is associated t…	Explicit	Dissolution rate in undersaturated waters (0.03 /d based on Maier-Reimer, 1993).	f(CO3, CO3_sat, K_PIC)	0.15 (fraction of calcite dissolved in micro/mesozooplankton guts: 0.5, based on Jansen and Wolf-Gladrow, 2001).	Implicit	Yes (the CaCO3 flux reaching the last model box that is not buried is redissolved instantaneously).	_	Same formulation as now proposed in mocsy.
IPSL	CMIP6	IPSL-CM6A-LR	France	Boucher et al. (2020)	PISCESv2	Aumont et al. (2015)	mocsy chemistry	olivier.aumont@ird.fr	1°x1° (0.33x0.33° in the equatorial region)	75 levels	122/16/1	500 yr online	No	Alk and DIC have been initialized from GLODAPv1.	(1) Use of a constant density: 1,028 kg/m3.	Fixed river discharge (DIC and Alk riverine inputs have been derived up from DOC riverine input from the Global Erosion Model (GEM) of Ludwig et al., 1996); River discharge of nutrients is computer from DIC using a global scaling factor to match global estimates of N and P supply. A diagenetic metamodel has been used for calcite and organic matter as decribed in the reference paper; nutrient disc…	Alkalinity external sources and sinks are not fully balanced.	A restoring toward the observed Alk global content is performed every year.	Visual validation with GLODAPv2 and with a Taylor diagram.	(1) No (2) No	Carbonate chemistry calculated via mocsy routine. (1) globally model tracer (2) function of salinity (Lee et al., 2010) (3) function of input tracers (4) globally model tracer (5) globally model tracer	Nitrification, N2-fixation and denitrification are considered in the ocean and affect Alk.	Yes	(1) No (2) Yes (3) Yes		Initialization: WOA2013. No drift and no restoring.	Calcite	Implicit	Coccolithophores, mainly Emiliana huxleyi (Zondervan, 2007).	f(T, light, mixed layer depth, nutrients nanophytoplankton (mortality), micro/mesozooplankton (grazing))	No	No	Explicit (variable: same speed as the large organic particles (GOC), between 30 m/d and 200 m/d).	Yes	Ballast effect (50% of the organic matter of the calcifiers is assumed to be associated with the shell, which infers that 50% of the biomass of the dying calcifiers is routed to the fast sinking particles). The feedback on organic matter is negligible though, since it only concerns the small organic particles (POC) produced by the nanophytoplankton group whereas most of the export is associated t…	Explicit	Dissolution rate in undersaturated waters (0.197 /d).	f(Ω)	0.5 for microzooplankton and 0.75 for mesozooplankton.	Explicit	Yes (CaCO3 dissolution at the seafloor depending on saturation state thresholds, parameterization following Archer, 1996).	f(Ω), but a bug in the equation has been noted and addressed in recent release of the model.	mocsy
MIROC	CMIP5	MIROC-ESM MIROC-ESM-CHEM	Japan	Watanabe et al. (2011)	OECO1	Watanabe et al. (2011)	None	michiow@aori.u-tokyo.ac.jp akitomo@aori.u-tokyo.ac.jp	1.4°x1° (finer in the equatorial region)	44 levels	106/16/1	1245 yr offline, 480 yr online	No	Alk and DIC have been initialized from GLODAPv1.	(1) Use of a constant density: 1,028 kg/m3.	River discharge localized at river mouths and this freshwater flux is variable. In addition to river water, evaporation and precipitation also contribute to changes in ocean tracer concentrations (S, Alk, DIC, NO3, etc).	Alk is neither added nor removed from the ocean.	No restoration.	Visual (GLODAPv1).	(1) No (2) No	Carbonate chemistry calculated via OCMIP2 protocol. (1) globally model tracer (2) function of salinity (3) function of input tracers (4) globally model tracer (5) SiO4 of 7.7 mmol/m3	_	Yes	(1) No (2) Yes (3) Yes		No information for the initial state. No restoration. No known drift.	Generic CaCO3 (not shared in the CMIP exercise)	Implicit	None	f(T, light, nutrients, phytoplankton (growth, mortality), zooplankton (grazing))	No	No	Explicit in the top 200 m (constant: 5 m/d) and implicit below 200 m	Yes	None	Explicit	Dissolution rate (0.05 /d) weighted by a function of T	f(T)	1	_	No, particles that sink to one layer above the seafloor are eventually transported to the upper layers by advection and diffusion.	_	_
MIROC	CMIP6	MIROC-ES2L	Japan	Hajima et al. (2020)	OECO2	Hajima et al. (2020)	None	michiow@aori.u-tokyo.ac.jp akitomo@aori.u-tokyo.ac.jp	1°x1° (finer in the equatorial region)	62 levels	106/16/1	3000 yr offline, 2483 yr online	No	Alk and DIC have been initialized from GLODAPv2.	(1) Use of a constant density: 1,028 kg/m3.	River discharge of freshwater and DIN; riverine N input is calculated online in the land model). Freshwater flux is variable and river discharge localized at river mouths. In addition to river water, evaporation and precipitation also contribute to changes in ocean tracer concentrations. Atmospheric deposition of N also affects Alk at the surface. The data from CMIP6 are applied to the model (htt…	Alkalinity external sources and sinks are not fully balanced.	No restoration. No significant drift.	Visual (GLODAPv2).	(1) No (2) No	Carbonate chemistry calculated via OCMIP2 protocol. (1) globally model tracer (2) function of salinity (3) function of input tracers (4) globally model tracer (5) SiO4 of 7.7 mmol/m3	N2-fixation and denitrification are considered in the ocean and affect Alk.	Yes	(1) No (2) Yes (3) Yes		The first salinity field is the Polar Hydrographic Climatology (PHC) 3.0 annual climatology.Polar Hydrographic Climatology (PHC) 3.0. First, we gave the PHC3.0 annual climatological field to an OGCM and integrated it for 1000 years. The last field obtained in the OGCM was taken to the AOGCM and integrated for about 2000 years while tuning. After the parameter set was determined, we further integr…	Generic CaCO3 (shared as calcite in the CMIP exercise).	Implicit	None	f(non-diazotrophic phytoplankton (mortality), zooplankton (mortality, grazing))	No	No	Implicit (use of a vertical length-scale of 6500 m).	Yes	None	Implicit	Production of CaCO3 is vertically integrated and it is dissolved in the water column with an exponential decay using an e-folding scale of 6500 m.	_	0.25	Implicit (the PIC that is not dissolved in the water collumn with the exponential decay is implicitly buried).	No	_	_
MOHC	CMIP5	HadGEM2-CC HadGEM2-ES	UK	Collins et al. (2011)	diat-HadOCC	Totterdell et al. (2019)	None	axy@noc.ac.uk	1°x1° (1°x0.33° in the equatorial region)	40 levels	106/16/1 (P is implied, not modelled)	50 yr online	Spin-up duration of the biogeochemical model of 50 yr to satisfy a 0.2 PgC/yr net air-sea CO2 flux criterion.	Alk and DIC have been initialized from GLODAPv1.	(4) Initial condition derived from previous simulation; Totterdell (2019) implies that, because of its low data density, GLODAPv1 was not used.	River discharge of freshwater semi-localised at river mouths. No atmospheric deposition.	Alkalinity is neither added nor removed from the ocean.	Alkalinity inventory fixed, but spatial distribution is obviously not fixed. No restoration.	Evaluation against GLODAPv1 using spatial plots and Taylor diagrams (Totterdell at al., 2019).	Carbonate system calculated using OCMIP2 protocol; surface calculations only, no interior calculation of carbonate chemistry (i.e. fixed lysocline depth). (1) N/A (2) N/A	Carbonate chemistry calculated via OCMIP2 protocol. (1) globally model tracer (2) function of salinity (3) function of input tracers	_	Yes.	(1) No (2) Yes (3) Yes		Initialization: WOA2009. No restoration No formal evaluation in Totterdell et al. (2019).	Generic CaCO3 (shared as calcite in the CMIP exercise).	Implicit	None	f(miscellaneous phytoplankton (growth))	No	No	Implicit (instantaneous dissolution in the water column below the lysocline).	No	None	Implicit	Instantaneous and evenly spread dissolution of the PIC below the lysocline.	f(lysocline (prescribed as a fixed depth of 2113m))	_	_	Yes (in water columns shallower than the lysocline, all dissolution occurs in the bottom cell).	-	_
MOHC	CMIP6	UKESM1-0-LL	UK	Sellar et al. (2019)	MEDUSA-2.1	Yool et al. (2013)	Carbonate chemistry subroutines updated to those of Orr and Epitalon (2015). No other changes to ocean carbonate / Alk systems. Complete description of changes between MEDUSA-2.0 and MEDUSA-2.1 in Yool et al. (2021).	axy@noc.ac.uk	1°x1°	75 levels	106/16/1 (P is implied, not modelled)	500 yr online (full details of the model spin-up available in Yool et al., 2020).	Spin-up duration of the biogeochemical model of 50 yr to satisfy a 0.1 PgC/yr net air-sea CO2 flux criterion.	Alk and DIC have been initialized from GLODAPv1.	(3) Use of in situ density calculated from WOA2009.	No river discharge, but freshwater discharge affects Alk. No atmospheric deposition.	Alkalinity is neither added nor removed from the ocean. Alkalinity may be temporarily stored in seafloor sediments.	Alkalinity inventory fixed (between ocean and sediments), but spatial distribution is obviously not fixed. No restoration.	Evaluation against GLODAPv1 (and fellow CMIP6 models) using spatial plots and Taylor diagrams (Yool et al., 2021).	(1) No (2) No	Carbonate chemistry calculated via mocsy routine. (1) globally model tracer (2) function of salinity (3) function of input tracers (4) globally model tracer (PO4 = DIN / 16) (5) globally model tracer	_	No	(1) No (2) Yes (3) Yes		Initialization: WOA2009. No restoration Some formal evaluation in Yool et al. (2020, 2021).	Calcite	Implicit	None	f(Ω, diatom phytoplankton (mortality), mesozooplankton (mortality))	No	No	Implicit (use of a vertical length-scale of 3500 m)	No	Protecting effect (Klaas and Archer, 2002)	Implicit	Dissolution below the lysocline with a vertical length-scale	Lysocline is calculated dynamically from local carbonate chemistry. Dissolution only occurs below it. Note that CaCO3 sediments above lysocline dissolve regardless of lysocline.	No	_ (CaCO3 can be trapped temporarily in seafloor reservoirs though)	Yes (seafloor reservoirs of CaCO3 dissolves back at a fixed specific rate)	-	Saturation state used to calculate CaCO3 production and to determine lysocline depth (mocsy used)
MPI-M	CMIP5	MPI-ESM-LR MPI-ESM-MR	Germany	Giorgetta et al. (2013)	HAMOCC5.2	Ilyina et al. (2013)		tatiana.ilyina@mpimet.mpg.de	1.5°x1.5° (LR) 0.4°x0.4° (MR)	40 levels	122/16/1	10,000 yr offline, 1,900 yr online	Weathering fluxes and CaCO3 content in the sediments have been increased during the spin-up phase to reduce the spin-up duration. This led to an increase in DIC with a 2:1 ratio so that the proportional overstimation of this pair maintained the correct pCO2.	Information not available	(4) Initialization with globally uniform mean concentrations of ocean tracers	No river discharge of carbon and nutrients. Freshwater discharge from rivers affacts Alk. No atmospheric deposition affecting Alk.	Alk budget is not balanced.	No restoration.	Information not available	Information not available	Carbonate chemistry calculated via OCMIP2 protocol. (1) globally model tracer (2) function of salinity (3) function of input tracers (4) globally model tracer (5) globally model tracer	N2-fixation and denitrification affecting Alk	Yes	(1) No (2) Yes (3) Yes		Information not available	Calcite	Implicit	Ernst Maier-Reimer left us with the information…	f(SiOH4, phytoplankton (mortality), zooplankton (grazing, mortality))	Yes	No	Explicit (constant: 30 m/d).	No	None	Explicit	Dissolution rate in undersaturated waters (0.0075 /d).	f(Ω)	0.2 for herbivore zooplankton and 0.05 for carnivore zooplankton.	Explicit	Yes	see Heinze at al., 1999	Calculation of the solubility product of calcite for dissolution.
MPI-M	CMIP6	MPI-ESM1-2-LR MPI-ESM1-2-HR	Germany	Mauritsen et al. (2019)	HAMOCC6.2	Paulsen et al. (2017)	Summarized in Mauritsen et al. (2019).	tatiana.ilyina@mpimet.mpg.de	1.5°x1.5° (LR) 0.4°x0.4° (HR)	40 levels	122/16/1	12,000 yr mixed	Information not available	Alk and DIC have been initialized from previous simulation.	(3) Use of in situ density from model.	No river discharge of carbon and nutrients. Freshwater discharge from rivers affacts Alk. No atmospheric deposition affecting Alk.	Alk budget is not balanced.	No restoration.	Visual (GLODAP).	(1) No (2) No	Carbonate chemistry calculated via OCMIP2 protocol. (1) globally model tracer (2) function of salinity (3) function of input tracers (4) globally model tracer (5) globally model tracer	N2-fixation and denitrification affecting Alk	Yes	(1) No (2) Yes (3) Yes		Information not available	Calcite	Implicit	Ernst Maier-Reimer left us with the information…	f(SiOH4, phytoplankton (mortality), zooplankton (grazing, mortality))	No	No	Explicit (constant: 30 m/d).	No	None	Explicit	Dissolution rate in undersaturated waters (0.0075 /d).	f(Ω)	0.2 for herbivore zooplankton and 0.05 for carnivore zooplankton.	Explicit	Yes	see Heinze at al., 1999	Calculation of the solubility product of calcite for dissolution.
MRI	CMIP5	MRI-ESM1	Japan	Adachi et al. (2013)	NPZD-MRI	Nakano et al. (2011)	None	htsujino@mri-jma.go.jp	1°x0.5°	51 levels	112/16/1	550 yr offline, 395 yr online	No	Alk and DIC have been initialized from GLODAPv1.	(3) Use of in situ density from observations (Polar Hydrographic Climatology, PHC).	River discharge is expressed as a part of the surface freshwater flux at river mouths. No riverine inputs of nutrients or Alk/DIC. No atmospheric deposition.	Alk is neither added nor removed from the ocean. No burial occurs for both organic matter and CaCO3.	No restoration. No notable drift.	Visual validation with GLODAPv1.	(1) No (2) No	Carbonate chemistry calculated via OCMIP2 protocol. (1) globally model tracer (2) function of salinity (3) function of input tracers (4) globally model tracer (5) 7.68375 mmol/m3 as a typical value for silicic acid	_	Yes	(1) No (2) Yes (3) Yes		Spun up for 2360 yr offline before coupling with the atmospheric component, initialized with Polar Hydrographic Climatology (a.k.a. PHC) with surface salinity restoring to a field provided by Coorinated Ocean-sea ice Reference Experiments (a.k.a. COREs) framework. Then coupled with the atmospheric component and integrated for a total of 420 yr without carbon cycle under the preindustrial conditio…	Calcite	Implicit	None	f(phytoplankton (growth, mortality), zooplankton (mortality, grazing))	No	No	Implicit (instantaneous dissolution in the water column with an e-folding length-scale of 3500 m).	No	None	Implicit	Production of CaCO3 is vertically integrated and it is dissolved in the column with an exponential decay using an e-folding scale of 3500 m.	_	0.075	_	Yes (the CaCO3 flux reaching the last model box is re-dissolved instantaneously).	-	_
MRI	CMIP6	MRI-ESM2-0	Japan	Yukimoto et al. (2019)	NPZD-MRI	Nakano et al. (2011)	Carbonate system equations are from OMP-BGC (Orr et al., 2017) and sinking velocity of detritus was 2.0 m/d in CMIP5 while in CMIP6 7.0 m/d is used.	htsujino@mri-jma.go.jp	1°x0.5° (1°x0.3° in the equatorial region)	61 levels	112/16/1	1736 yr offline, 500 yr online	No	Alk and DIC have been initialized from GLODAPv2.	(1) Use of a constant density: 1024,5 kg/m3.	River discharge is expressed as a part of the surface freshwater flux at river mouths. No riverine inputs of nutrients or Alk/DIC. No atmospheric deposition.	Alk is neither added nor removed from the ocean. No burial occurs for both organic matter and CaCO3.	No restoration. No notable drift.	Visual validation with GLODAPv2.	(1) No (2) No	Carbonate chemistry calculated via mocsy routine. (1) globally model tracer (2) function of salinity (3) function of input tracers (4) globally model tracer (5) climatology from WOA13v2 for silicic acid	_	Yes	(1) No (2) Yes (3) Yes		Spun up for 342 yr offline before coupling with the atmospheric component, initialized with World Ocean Atlas version 2 (WOA13v2) and with surface salinity restoring to 0-10 m mean of monthly WOA13v2. Then coupled with the atmospheric component and integrated for a total of 1000 yr without carbon cycle under the preindustrial condition without restoration. Finally the ocean biogeochemistry is int…	Calcite	Implicit	None	f(phytoplankton (mortality), zooplankton (mortality, grazing))	No	No	Implicit (instantaneous dissolution in the water column with an e-folding length-scale of 3500 m).	No	None	Implicit	Production of CaCO3 is vertically integrated and it is dissolved in the column with an exponential decay using an e-folding scale of 3500 m.	_	0.075	_	Yes (the CaCO3 flux reaching the last model box is re-dissolved instantaneously).	-	_
NCAR	CMIP5	CESM1(BGC)	USA	Hurrell et al. (2013)	BEC	Lindsay et al. (2014)	None	kristenk@ucar.edu	1.125°x0.53° (1.125°x0.27° in the equatorial region)	60 levels	117/16/1	1025 yr online	The remineralization length scale for unballasted sinking POM was increased from 200 to 210 m at year 915 to reduce the outgassing to ~0.06 PgC/yr at year 1025.	Alk and DIC initialized using GLODAPv1.	(1) Use of a constant density: 1,026 kg/m3.	Freshwater fluxes (sea ice formation/melt, precipitation-evaporation, river discharge) affect Alk and DIC concentrations via a virtual flux. Freshwater fluxes are variable for sea ice melt, precipitation/evaporation... but fixed for river input. Atmospheric localized N deposition from a fixed climatology, affecting Alk.	Alkalinity external sources and sinks are not fully balanced.	No restoring. Drift exists.	Visual (GLODAPv1).	(1) No (2) No	Carbonate chemistry calculated via mocsy routine. (1) globally model tracer (2) function of salinity (3) function of input tracers (4) globally model tracer (5) globally model tracer	Nitrification, N2-fixation and denitrifiction, affecting Alk.	Yes	(1) Yes, assume constant Alk:salinity ratio and compute Alk flux based on that ratio (same for DIC) (2) Yes (3) Yes		Prior to 1850 in the piControl, a preliminary preindustrial simulation was integrated for 130 yr, starting with the January-mean climatological Polar Science Center Hydrographic Climatology (PHC). Validation with the Polar Science Center Hydrographic observations. For more details see Danabasoglu et al., 2012.	Calcite	Implicit	Implicit fraction of the small phytoplankton PFT, representing coccolithophores mainly based on Emiliana huxleyi (Iglesias-Rodríguez et al., 2002).	f(T, small phytoplankton (mortality, calcite pool), zooplankton (grazing))	No	No	Implicit (instantaneous dissolution in the water column with an e-folding length-scale of 800 m).	No	Ballast effect with a fraction (0.55) of the CaCO3 that is routed to hard particles, and protecting effect (Armstrong et al., 2001).	Implicit	Exponential decay of CaCO3 flux with depth with a length-scale of 800 m.	_	0.67	_	Yes (the CaCO3 flux reaching the last model box is re-dissolved instantaneously).	_	_
NCAR	CMIP6	CESM2 CESM2-WACCM-FV2 CESM2-FV2 CESM2-WACCM	USA	Danabasoglu et al. (2020)	MARBL	Long et al. (2021)	None	kristenk@ucar.edu	1.125°x0.53° (1.125°x0.27° in the equatorial region)	61 levels	Variable C/P, C/N is 117/16	1029 yr online	In the spin-up, the Ωcrit value (the threshold for CaCO3 burial) was manually adjusted at several points during the spin-up to ensure that loss of Alk from burial of CaCO3 balanced riverine input of alkalinity. The final threshold value was 0.89, which was the value used in all subsequent experiments. Scaling coefficients applied to the burial of POM and silica at the seafloor were automatically …	Initialization of piControl done using Newton-Krylov based solver (see section 2.3.1 in Long et al., 2021).	(1) Use of a constant density: 1,026 kg/m3.	Riverine input of DIC, Alk and nutrients from GlobalNEWS (Mayorga et. al, 2010) and the Integrated Model to Assess the Global Environment-Global Nutrient Model (IMAGE-GNM; Beusen et la., 2015,2016). Riverine DIC inputs are assumed to be all bicarbonate and thus Alk inputs are equal to DIC. N input from rivers affect Alk. Freshwater fluxes (sea ice formation/melt, precipitation-evaporation, river …	Alkalinity external sources and sinks are not fully balanced. Nonetheless, CaCO3 burial in the sediments is set to balance river inputs at the end of the spin-up.	No restoring. Drift exists.	Visual (GLODAPv2).	(1) No (2) No	Carbonate chemistry calculated via mocsy routine. (1) globally model tracer (2) function of salinity (3) function of input tracers (4) globally model tracer (5) globally model tracer	Nitrification, N2-fixation, denitrification in open ocean and sediments, affecting Alk.	Yes	(1) Yes, assume constant Alk:salinity ratio and compute Alk flux based on that ratio (same for DIC) (2) Yes (3) Yes		Drift in temperature and salinity eliminated by resetting ocean physical state every 21 years when creating the initial state for the piControl (see Long et al., 2021 and Danabasoglu et la., 2020). Validated by visually comparing to WOA.	Calcite	Implicit	Implicit fraction of the small phytoplankton PFT, representing coccolithophores mainly based on Emiliana huxleyi (Iglesias-Rodríguez et al., 2002).	f(T, small phytoplankton (mortality, calcite pool), zooplankton (grazing))	No	No	Implicit (instantaneous dissolution in the water column with an e-folding length-scale of 500 m for the top 100 m, then the length-scale is larger with depth).	No	Protecting effect (Armstrong et al., 2001).	Implicit	Exponential decay of CaCO3 flux with depth with a length-scale that varies with depth, from 500 m in the top 100 m to 2400 m below 1000 m.	_	0.67	Explicit	Yes (CaCO3 dissolution at the seafloor for Ω<0.89).	f(Ω)	Satuartion state used for burial. There's a carbonate chemistry subroutine in MARBL: https://github.com/marbl-ecosys/MARBL/blob/stable/src/marbl_co2calc_mod.F90.
NCC	CMIP5	NorESM1-ME	Norway	Tjiputra et al. (2013)	HAMOCC5.1	Tjiputra et al. (2013)	None	jetj@norceresearch.no	1°x1° (finer in the equatorial region)	53 isopycnals	122/16/1	900 yr online	No	Alk and DIC have been initialized from GLODAPv1.	(3) Use of in sity density from model.	No river discharge, but freshwater discharge affects Alk. No atmospheric deposition.	The burial of CaCO3 in the sediments is not balanced.	No restoring. Drift exists.	Visual validation with GLODAPv1 plus Taylor diagram.	(1) Yes (2) No (although a constant density is assumed)	Carbonate chemistry calculated via OCMIP2 protocol. (1) globally model tracer (2) function of salinity (Uppström, 1974) (3) function of input tracers (4) globally model tracer (5) globally model tracer	N2-fixation and denitrification in the open ocean, without affecting Alk.	Yes	(1) No (2) Yes (2) Yes		Initialized with salinity fields from the Polar science center Hydrographic Climatology (PHC) 3.0 updated from Steele et al. (2001). No restoration. Validation and drift (very small) are documented in CMIP5: Bentsen et al. (2013) and CMIP6: Seland et al. (2020).	Calcite	Implicit	None	f(silica, phytoplankton (mortality), zooplankton (grazing, mortality))	No	No	Explicit (constant: 30 m/d).	Yes	None	Explicit	Dissolution rate in undersaturated waters, but dimension issue in the equation.	f(Ω)	0.2 from herbivore zooplankton and 0.05 from carnivore zooplankton.	Explicit	Yes (HAMOCC sediment module, Heinze et al., 1999) Organic/inorganic matter that is remineralized/dissolved in the sediments affects the bottom level of the ocean through pore water diffusion from the sediment.	f(Ω,sediment dynamics)	Use of the original formulation from HAMOCC5.
NCC	CMIP6	NorESM2-LM	Norway	Seland et al. (2020)	iHAMOCC	Tjiputra et al. (2020)	None	jetj@norceresearch.no, jrsc@norceresearch.no	1°x1° (finer in the equatorial region)	53 isopycnals	122/16/1	1600 yr online	CaCO3-to-phosphate ratio during PIC production was adjusted to reduce the positive Alk bias in previous version (Schwinger et al., 2016).	Alk and DIC have been initialized from GLODAPv2.	(3) Use of in situ density from model.	Riverine input of DIC and Alk are taken from Hartmann (2009). Nutrients: nitrate, phosphate, silicate from Global-NEWS model (Mayorga et al., 2010), and iron from Chester (1990). Freshwater and river disharge are online coupled. Riverine fluxes are interpolated at river mouths in the same way as the freshwater runoff to the ocean grid (distributed as a function of river mouth distance with an e-f…	Riverine source and the burial of CaCO3 in the sediments are not balanced.	No restoring. Drift exists.	Visual validation with GLODAPv2 plus Taylor diagram.	(1) Yes (2) No (although a constant density is assumed)	Carbonate chemistry calculated via mocsy routine. (1) globally model tracer (2) function of salinity (Uppström, 1974) (3) function of input tracers (4) globally model tracer (5) globally model tracer	N2-fixation and denitrification in the open ocean, which affects Alk.	Yes	(1) No (2) Yes (2) Yes		Initialized with salinity fields from the Polar science center Hydrographic Climatology (PHC) 3.0 updated from Steele et al. (2001). No restoration. Validation and drift (very small) are documented in CMIP5: Bentsen et al. (2013) and CMIP6: Seland et al. (2020).	Calcite	Implicit	None	f(silica, phytoplankton (mortality), zooplankton (grazing, mortality))	Yes	No	Explicit (constant: 30 m/d).	Yes	None	Explicit	Dissolution rate in undersaturated waters, but a dimension issue has been noted in the equation.	f(Ω)	0.15 from herbivore zooplankton and 0.05 from carnivore zooplankton.	Explicit	Yes (HAMOCC sediment module, Heinze et al., 1999) Organic/inorganic matter that is remineralized/dissolved in the sediments affects the bottom level of the ocean through pore water diffusion from the sediment.	f(Ω, sediment dynamics)	Use of mocsy with Ca2+=0.28 [mmol/kg]xS/35.
NOAA-GFDL	CMIP5	GFDL-ESM2M	USA	Dunne et al. (2013)	TOPAZ2	Dunne et al. (2013)	None	john.dunne@noaa.gov	1°x1° (finer in the equatorial region)	50 pressure levels	106/16, Variable N/P	1000 yr online	Aragonite tuned to reproduce Alk/phosphate vertical gradient in tropical pacific.	Alk and DIC have been initialized from GLODAPv1.	mol/kg are native model units converted to mol/m3 using constant 1,035 kg/m3 (1).	River fluxes of DIC and Alk set to match a presumed steady state calcite burial (cf. aragonite is not buried) of 0.1 PgC/yr. Concentrations of NO3 and NH4 are set for river mouths after Seitzinger at al. (2005, Global NEWS). Atmospheric localized N-deposition from Horowitz et al. (2003), affecting Alk with a 1:1 ratio for Alk:NO3.	Riverine source and sediment loss are not balanced.	No restoring. Drift exists.	Visual (GLODAPv1).	(1) No (2) No	Carbonate chemistry calculated via OCMIP2 protocol. (1) globally model tracer (2) function of salinity (3) function of input tracers (4) globally model tracer (5) globally model tracer	N2-fixation and denitrification in water column and sediments (Middelburg et al., 1996). N2-fixation is assumed not to impact alkalinity while denitrification increases Alk at a ratio of 552:472 for Alk:N.	Yes	(1) No (2) Yes (3) Yes		Initialized with WOA2009. No known drift. No restoration.	Calcite and aragonite	Implicit	None	f(T, Ω, small phytoplankton (growth)) for calcite f(Ω, large phytoplankton (growth)) for aragonite	No	No	Explicit (constant: 100 m/d).	Yes	Protection effect (Klaas and Archer, 2002; at each time step, a constant fraction of POC is associated with PIC, being totally protected from remineralization for the time step; unprotected POC for the time step has a remineralization length-scale of 187 m compared to the CaCO3 dissolution length-scale of 1343 m for calcite and 760 m for aragonite).	Explicit	Dissolution in undersaturated waters.	f(Ω)	No	Explicit for calcite and ignored for aragonite.	Yes (one-box metamodel of Dunne et al., 2012 for calcite; the aragonite flux reaching the last model box is re-dissolved instantaneously).	f(Ω, PIC, PILi) for calcite	Calculated following OCMIP-2 protocol.
NOAA-GFDL	CMIP5	GFDL-ESM2G	USA	Dunne et al. (2013)	TOPAZ2	Dunne et al. (2013)	None	john.dunne@noaa.gov	1°x1° (finer in the equatorial region)	63 isopycnal layers	106/16, Variable N/P	1000 yr online	No, settings taken from GFDL-ESM2M.	Alk and DIC have been initialized from GLODAPv1.	mol/kg are native model units converted to mol/m3 using constant 1,035 kg/m3 (1).	River fluxes of DIC and Alk set to match a presumed steady state calcite burial (cf. aragonite is not buried) of 0.1 PgC/yr. Concentrations of NO3 and NH4 are set for river mouths after Seitzinger at al. (2005, Global NEWS). Atmospheric localized N-deposition from Horowitz et al. (2003), affecting Alk with a 1:1 ratio for Alk:NO3.	Riverine source and sediment loss are not balanced.	No restoring. Drift exists.	Visual (GLODAPv1).	(1) No (2) No	Carbonate chemistry calculated via OCMIP2 protocol. (1) globally model tracer (2) function of salinity (3) function of input tracers (4) globally model tracer (5) globally model tracer	N2-fixation and denitrification in water column and sediments (Middelburg et al., 1996). N2-fixation is assumed not to impact alkalinity while denitrification increases Alk at a ratio of 552:472 for Alk:N.	Yes	(1) No (2) Yes (3) Yes		Initialized with WOA2009. No known drift. No restoration.	Calcite and aragonite	Implicit	None	f(T, Ω, small phytoplankton (growth)) for calcite f(Ω, large phytoplankton (growth)) for aragonite	No	No	Explicit (constant: 100 m/d).	Yes	Protection effect (Klaas and Archer, 2002; at each time step, a constant fraction of POC is associated with PIC, being totally protected from remineralization for the time step; unprotected POC for the time step has a remineralization length-scale of 187 m compared to the CaCO3 dissolution length-scale of 1343 m for calcite and 760 m for aragonite).	Explicit	Dissolution in undersaturated waters.	f(Ω)	No	Explicit for calcite and ignored for aragonite.	Yes (one-box metamodel of Dunne et al., 2012 for calcite; the aragonite flux reaching the last model box is re-dissolved instantaneously).	f(Ω, PIC, PILi) for calcite	Calculated following OCMIP-2 protocol.
NOAA-GFDL	CMIP6	GFDL-CM4	USA	Held et al. (2019)	BLINGv2	Dunne et al. (2020a)	None	john.dunne@noaa.gov	0.25°x0.25°	75 hybrid pressure levels and isopycnal layers	106/16/1	250 yr online	No	Alk and DIC have been initialized from GLODAPv1.	mol/kg are native model units converted to mol/m3 using constant 1,035 kg/m3 (1).	River fluxes with a constant concentration of DIC, Alk, and PO4 at river mouths to match 0.1 PgC/yr CaCO3 and 0.3 PgC/yr organic carbon burial in Dunne et al., 2007. No atmospheric deposition.	Riverine source and sediment loss are not balanced.	No restoring. Drift exists.	Visual (GLODAPv2).	(1) No (2) No	Carbonate chemistry calculated via mocsy routine. (1) globally model tracer (2) function of salinity (3) function of input tracers (4) globally model tracer (5) SIO4 approximated as 14.4xPO4	_	Yes	(1) No (2) Yes (3) Yes		Initialized with WOA2013. No known drift. No restoration.	Calcite	Implicit	None	f(T, Ω, phytoplankton (growth))	No	No	Implicit	No	Protection effect (Klaas and Archer, 2002). At each time step, a constant fraction of POC is associated with PIC, being totally protected from remineralization for the time step. Unprotected POC for the time step has a remineralization length scale that increases with depth through a constant decay rate above the ballasted fraction and a sinking velocity that increases with depth.	Explicit	Rate of dissolution in undersaturated waters proportional to the degree of undersaturation.	f(Ω)	No	Explicit	Yes (one-box metamodel of Dunne et al., 2012).	f(Ω, PIC, PILi, POC)	Calculated with mocsy.
NOAA-GFDL	CMIP6	GFDL-ESM4	USA	Dunne et al. (2020b)	COBALTv2	Stock et al. (2020)	None	charles.stock@noaa.gov	0.5°x0.5° (finer in the equatorial region)	75 hybrid pressure levels and isopycnal layers	106/16, Variable N/P	500 yr online	Aragonite tuned to reproduce alk/phosphate vertical gradient in tropical pacific. Sediment calcite concentrations were set such that Alk lost via calcite burial matched river Alk inputs at year 360 using an offline calculation described in Dunne et al., 2012). Riverine DIC concentrations were also calibrated to match calcite and organic carbon burial at year 360 of the spin up.	Alk and DIC have been initialized from GLODAPv1.	mol/kg are native model units converted to mol/m3 using constant 1,035 kg/m3 (1).	River fluxes of DIC and Alk set to match a presumed steady state calcite burial of 0.1 PgC/yr. Nutrients added through rivers (GlobalNEWS) can affect Alk. Sedimentary calcite can be mobilized through changes in the calcite saturation state during historical period or in projections. Atmospheric N-deposition interactively with atmosphere that can also contribute to Alk shifts (Stock et al., 2020).	Riverine source and sediment loss coarsely balanced during pre-industrial period, but can shift afterward.	No restoring. Drift exists.	Quantitative comparison against surface GLODAPv2 and along depth-resolved transects (Stock et al., 2020).	(1) No (2) No	Carbonate chemistry calculated via mocsy routine. (1) globally model tracer (2) function of salinity (3) function of input tracers (4) globally model tracer (5) globally model tracer	N2-fixation and denitrification in water column and sediments (Middelburg et al., 1996), but only denitrification affects Alk.	Yes	(1) No (2) Yes (3) Yes		Initialized with WOA 2013. From Dunne et al., 2020b: "In the preindustrial control simulation (piControl), the ESM4.1 ocean is initialized with 4.7967518803517374 × 10^19 kg of salt. The total amount of salt in sea ice varies the ocean inventory on the order of 10^10 kg. Total drift in ocean salt content over the 900 year piControl through accumulated errors in the numerics made for an addition o…	Calcite and aragonite	Implicit	Production of calcite and aragonite detritus is a function of the calcite/aragonite saturation state and sources of detritus associated with these minerals. Potential calcite sources from coccolithophorids include phytoplankton aggregation and fecal pellets from zooplankton grazing on phytoplankton. A calcite detritus source from forams is associated with the production of fecal pellets from medi…	f(Ω, small/large phytoplankton (aggregation and grazing), small zooplankton (consumption by zooplankton)) for calcite f(Ω, medium zooplankton (consumption by zooplankton), medium/large zooplankton (consumption by higher predators))	No	No	Explicit (constant: 100 m/d).	Yes	Protection effect (Klaas and Archer, 2002; at each time step, a constant fraction of POC is associated with PIC, being totally protected from remineralization for the time step; unprotected POC for the time step has a remineralization length-scale of 345 m compared to the CaCO3 dissolution length-scale of 1343 m for calcite and 760 m for aragonite).	Explicit	Rate of dissolution in undersaturated waters proportional to the degree of undersaturation.	f(Ω)	0.10 (small zooplankton), 0.20 (medium zooplankton), 0.30 (large zooplankton) and 0.35 (large zooplankton).	Explicit for calcite and ignored for aragonite.	Yes (one-box metamodel of Dunne et al., 2012 for calcite; the aragonite flux reaching the last model box is re-dissolved instantaneously) Sedimentary calcite set to equilibrium with the pre-industrial calcite flux to the sediment using an offline calculation based on Dunne et al. (2012).	f(Ω, PIC, PILi, POC) for calcite	Calculated with mocsy.

## Sheet: References
Acronym	Reference
	Adachi, Y., Yukimoto, S., Deushi, M., Obata, A., Nakano, H., Tanaka, Taichu. Y., Hosaka, M., Sakami, T., Yoshimura, H., Hirabara, M., Shindo, E., Tsujino, H., Mizuta, R., Yabu, S., Koshiro, T., Ose, T., and Kitoh, A.: Basic performance of a new earth system model of the Meteorological Research Institute (MRI-ESM1), Pap. Meteorol. Geophys., 64, 1–19, https://doi.org/10.2467/mripapers.64.1, 2013.
	Archer, D. E.: An atlas of the distribution of calcium carbonate in sediments of the deep sea, Glob. Biogeochem. Cycles, 10, 159–174, https://doi.org/10.1029/95GB03016, 1996.
	Armstrong, R. A., Lee, C., Hedges, J. I., Honjo, S., and Wakeham, S. G.: A new, mechanistic model for organic carbon fluxes in the ocean based on the quantitative association of POC with ballast minerals, Deep Sea Res. Part II Top. Stud. Oceanogr., 49, 219–236, https://doi.org/10.1016/S0967-0645(01)00101-1, 2001.
	Arora, V. K., Scinocca, J. F., Boer, G. J., Christian, J. R., Denman, K. L., Flato, G. M., Kharin, V. V., Lee, W. G., and Merryfield, W. J.: Carbon emission limits required to satisfy future representative concentration pathways of greenhouse gases: ALLOWABLE FUTURE CARBON EMISSIONS, Geophys. Res. Lett., 38, n/a-n/a, https://doi.org/10.1029/2010GL046270, 2011.
	Aumont, O.: PISCES biogeochemical model, 2005.
	Aumont, O., Ethé, C., Tagliabue, A., Bopp, L., and Gehlen, M.: PISCES-v2: an ocean biogeochemical model for carbon and ecosystem studies, Geosci. Model Dev., 8, 2465–2513, https://doi.org/10.5194/gmd-8-2465-2015, 2015.
	Bentsen, M., Bethke, I., Debernard, J. B., Iversen, T., Kirkevåg, A., Seland, Ø., Drange, H., Roelandt, C., Seierstad, I. A., Hoose, C., and Kristjánsson, J. E.: The Norwegian Earth System Model, NorESM1-M – Part 1: Description and basic evaluation of the physical climate, Geosci. Model Dev., 6, 687–720, https://doi.org/10.5194/gmd-6-687-2013, 2013.
	Beusen, A. H. W., Van Beek, L. P. H., Bouwman, A. F., Mogollón, J. M., and Middelburg, J. J.: Coupling global models for hydrology and nutrient loading to simulate nitrogen and phosphorus retention in surface water &ndash; description of IMAGE–GNM and analysis of performance, Geosci. Model Dev., 8, 4045–4067, https://doi.org/10.5194/gmd-8-4045-2015, 2015.
	Beusen, A. H. W., Bouwman, A. F., Van Beek, L. P. H., Mogollón, J. M., and Middelburg, J. J.: Global riverine N and P transport to ocean increased during the 20th century despite increased retention along the aquatic continuum, Biogeosciences, 13, 2441–2451, https://doi.org/10.5194/bg-13-2441-2016, 2016.
	Bock, J., Michou, M., Nabat, P., Abe, M., Mulcahy, J. P., Olivié, D. J. L., Schwinger, J., Suntharalingam, P., Tjiputra, J., van Hulten, M., Watanabe, M., Yool, A., and Séférian, R.: Evaluation of ocean dimethylsulfide concentration and emission in CMIP6 models, Biogeosciences, 18, 3823–3860, https://doi.org/10.5194/bg-18-3823-2021, 2021.
	Boucher, O., Servonnat, J., Albright, A. L., Aumont, O., Balkanski, Y., Bastrikov, V., Bekki, S., Bonnet, R., Bony, S., Bopp, L., Braconnot, P., Brockmann, P., Cadule, P., Caubel, A., Cheruy, F., Codron, F., Cozic, A., Cugnet, D., D’Andrea, F., Davini, P., Lavergne, C., Denvil, S., Deshayes, J., Devilliers, M., Ducharne, A., Dufresne, J., Dupont, E., Éthé, C., Fairhead, L., Falletti, L., Flavoni,…
	Chester, R.: Trace elements in the oceans, in: Marine Geochemistry, edited by: Chester, R., Springer Netherlands, Dordrecht, 346–421, https://doi.org/10.1007/978-94-010-9488-7_11, 1990.
	Christian, J. R., Denman, K. L., Hayashida, H., Holdsworth, A. M., Lee, W. G., Riche, O. G. J., Shao, A. E., Steiner, N., and Swart, N. C.: Ocean biogeochemistry in the Canadian Earth System Model version 5.0.3: CanESM5 and CanESM5-CanOE, Geosci. Model Dev., 15, 4393–4424, https://doi.org/10.5194/gmd-15-4393-2022, 2022.
	Collins, W. J., Bellouin, N., Doutriaux-Boucher, M., Gedney, N., Halloran, P., Hinton, T., Hughes, J., Jones, C. D., Joshi, M., Liddicoat, S., Martin, G., O’Connor, F., Rae, J., Senior, C., Sitch, S., Totterdell, I., Wiltshire, A., and Woodward, S.: Development and evaluation of an Earth-System model – HadGEM2, Geosci. Model Dev., 4, 1051–1075, https://doi.org/10.5194/gmd-4-1051-2011, 2011.
	Danabasoglu, G., Bates, S. C., Briegleb, B. P., Jayne, S. R., Jochum, M., Large, W. G., Peacock, S., and Yeager, S. G.: The CCSM4 Ocean Component, J. Clim., 25, 1361–1389, https://doi.org/10.1175/JCLI-D-11-00091.1, 2012.
	Danabasoglu, G., Lamarque, J. ‐F., Bacmeister, J., Bailey, D. A., DuVivier, A. K., Edwards, J., Emmons, L. K., Fasullo, J., Garcia, R., Gettelman, A., Hannay, C., Holland, M. M., Large, W. G., Lauritzen, P. H., Lawrence, D. M., Lenaerts, J. T. M., Lindsay, K., Lipscomb, W. H., Mills, M. J., Neale, R., Oleson, K. W., Otto‐Bliesner, B., Phillips, A. S., Sacks, W., Tilmes, S., Kampenhout, L., Verten…
OCMIP2	Doney, S. C., Lindsay, K., Caldeira, K., Campin, J.-M., Drange, H., Dutay, J.-C., Follows, M., Gao, Y., Gnanadesikan, A., Gruber, N., Ishida, A., Joos, F., Madec, G., Maier-Reimer, E., Marshall, J. C., Matear, R. J., Monfray, P., Mouchet, A., Najjar, R., Orr, J. C., Plattner, G.-K., Sarmiento, J., Schlitzer, R., Slater, R., Totterdell, I. J., Weirig, M.-F., Yamanaka, Y., and Yool, A.: Evaluating …
	Dufresne, J.-L., Foujols, M.-A., Denvil, S., Caubel, A., Marti, O., Aumont, O., Balkanski, Y., Bekki, S., Bellenger, H., Benshila, R., Bony, S., Bopp, L., Braconnot, P., Brockmann, P., Cadule, P., Cheruy, F., Codron, F., Cozic, A., Cugnet, D., de Noblet, N., Duvel, J.-P., Ethé, C., Fairhead, L., Fichefet, T., Flavoni, S., Friedlingstein, P., Grandpeix, J.-Y., Guez, L., Guilyardi, E., Hauglustaine…
	Dunne, J. P., Sarmiento, J. L., and Gnanadesikan, A.: A synthesis of global particle export from the surface ocean and cycling through the ocean interior and on the seafloor, Glob. Biogeochem. Cycles, 21, https://doi.org/10.1029/2006GB002907, 2007.
	Dunne, J. P., Hales, B., and Toggweiler, J. R.: Global calcite cycling constrained by sediment preservation controls, Glob. Biogeochem. Cycles, 26, 2010GB003935, https://doi.org/10.1029/2010GB003935, 2012.
	Dunne, J. P., John, J. G., Shevliakova, E., Stouffer, R. J., Krasting, J. P., Malyshev, S. L., Milly, P. C. D., Sentman, L. T., Adcroft, A. J., Cooke, W., Dunne, K. A., Griffies, S. M., Hallberg, R. W., Harrison, M. J., Levy, H., Wittenberg, A. T., Phillips, P. J., and Zadeh, N.: GFDL’s ESM2 Global Coupled Climate–Carbon Earth System Models. Part II: Carbon System Formulation and Baseline Simulat…
	Dunne, J. P., Bociu, I., Bronselaer, B., Guo, H., John, J. G., Krasting, J. P., Stock, C. A., Winton, M., and Zadeh, N.: Simple Global Ocean Biogeochemistry With Light, Iron, Nutrients and Gas Version 2 (BLINGv2): Model Description and Simulation Characteristics in GFDL’s CM4.0, J. Adv. Model. Earth Syst., 12, https://doi.org/10.1029/2019MS002008, 2020a.
	Dunne, J. P., Horowitz, L. W., Adcroft, A. J., Ginoux, P., Held, I. M., John, J. G., Krasting, J. P., Malyshev, S., Naik, V., Paulot, F., Shevliakova, E., Stock, C. A., Zadeh, N., Balaji, V., Blanton, C., Dunne, K. A., Dupuis, C., Durachta, J., Dussin, R., Gauthier, P. P. G., Griffies, S. M., Guo, H., Hallberg, R. W., Harrison, M., He, J., Hurlin, W., McHugh, C., Menzel, R., Milly, P. C. D., Niko…
	Giorgetta, M. A., Jungclaus, J., Reick, C. H., Legutke, S., Bader, J., Böttinger, M., Brovkin, V., Crueger, T., Esch, M., Fieg, K., Glushak, K., Gayler, V., Haak, H., Hollweg, H.-D., Ilyina, T., Kinne, S., Kornblueh, L., Matei, D., Mauritsen, T., Mikolajewicz, U., Mueller, W., Notz, D., Pithan, F., Raddatz, T., Rast, S., Redler, R., Roeckner, E., Schmidt, H., Schnur, R., Segschneider, J., Six, K.…
	Hajima, T., Watanabe, M., Yamamoto, A., Tatebe, H., Noguchi, M. A., Abe, M., Ohgaito, R., Ito, A., Yamazaki, D., Okajima, H., Ito, A., Takata, K., Ogochi, K., Watanabe, S., and Kawamiya, M.: Development of the MIROC-ES2L Earth system model and the evaluation of biogeochemical processes and feedbacks, Geosci. Model Dev., 13, 2197–2244, https://doi.org/10.5194/gmd-13-2197-2020, 2020.
	Hartmann, J.: Bicarbonate-fluxes and CO2-consumption by chemical weathering on the Japanese Archipelago — Application of a multi-lithological model framework, Chem. Geol., 265, 237–271, https://doi.org/10.1016/j.chemgeo.2009.03.024, 2009.
	Heinze, C., Maier-Reimer, E., Winguth, A. M. E., and Archer, D.: A global oceanic sediment model for long-term climate studies, Glob. Biogeochem. Cycles, 13, 221–250, https://doi.org/10.1029/98GB02812, 1999.
	Held, I. M., Guo, H., Adcroft, A., Dunne, J. P., Horowitz, L. W., Krasting, J., Shevliakova, E., Winton, M., Zhao, M., Bushuk, M., Wittenberg, A. T., Wyman, B., Xiang, B., Zhang, R., Anderson, W., Balaji, V., Donner, L., Dunne, K., Durachta, J., Gauthier, P. P. G., Ginoux, P., Golaz, J. ‐C., Griffies, S. M., Hallberg, R., Harris, L., Harrison, M., Hurlin, W., John, J., Lin, P., Lin, S. ‐J., Malys…
	Horowitz, L. W., Walters, S., Mauzerall, D. L., Emmons, L. K., Rasch, P. J., Granier, C., Tie, X., Lamarque, J.-F., Schultz, M. G., Tyndall, G. S., Orlando, J. J., and Brasseur, G. P.: A global simulation of tropospheric ozone and related tracers: Description and evaluation of MOZART, version 2, J. Geophys. Res. Atmospheres, 108, https://doi.org/10.1029/2002JD002853, 2003.
	Hurrell, J. W., Holland, M. M., Gent, P. R., Ghan, S., Kay, J. E., and Kushner, P. J.: THE COMMUNITY EARTH SYSTEM MODEL, 2013.
	Iglesias-Rodríguez, M. D., Brown, C. W., Doney, S. C., Kleypas, J., Kolber, D., Kolber, Z., Hayes, P. K., and Falkowski, P. G.: Representing key phytoplankton functional groups in ocean carbon cycle models: Coccolithophorids, Glob. Biogeochem. Cycles, 16, 47-1-47–20, https://doi.org/10.1029/2001GB001454, 2002.
	Ilyina, T., Six, K. D., Segschneider, J., Maier‐Reimer, E., Li, H., and Núñez‐Riboni, I.: Global ocean biogeochemistry model HAMOCC: Model architecture and performance as component of the MPI‐Earth system model in different CMIP5 experimental realizations, J. Adv. Model. Earth Syst., 5, 287–315, https://doi.org/10.1029/2012MS000178, 2013.
	Jansen, H. and Wolf-Gladrow, D.: Carbonate dissolution in copepod guts: a numerical model, Mar. Ecol. Prog. Ser., 221, 199–207, https://doi.org/10.3354/meps221199, 2001.
GLODAPv1	Key, R. M., Kozyr, A., Sabine, C. L., Lee, K., Wanninkhof, R., Bullister, J. L., Feely, R. A., Millero, F. J., Mordy, C., and Peng, T.-H.: A global ocean carbon climatology: Results from Global Data Analysis Project (GLODAP): GLOBAL OCEAN CARBON CLIMATOLOGY, Glob. Biogeochem. Cycles, 18, n/a-n/a, https://doi.org/10.1029/2004GB002247, 2004.
	Klaas, C. and Archer, D. E.: Association of sinking organic matter with various types of mineral ballast in the deep sea: Implications for the rain ratio, Glob. Biogeochem. Cycles, 16, 63-1-63–14, https://doi.org/10.1029/2001GB001765, 2002.
GLODAPv2	Lauvset, S. K., Key, R. M., Olsen, A., van Heuven, S., Velo, A., Lin, X., Schirnick, C., Kozyr, A., Tanhua, T., Hoppema, M., Jutterström, S., Steinfeldt, R., Jeansson, E., Ishii, M., Perez, F. F., Suzuki, T., and Watelet, S.: A new global interior ocean mapped climatology: the 1◦ × 1◦ GLODAP version 2, 16, 2016.
	Law, R. M., Ziehn, T., Matear, R. J., Lenton, A., Chamberlain, M. A., Stevens, L. E., Wang, Y.-P., Srbinovsky, J., Bi, D., Yan, H., and Vohralik, P. F.: The carbon cycle in the Australian Community Climate and Earth System Simulator (ACCESS-ESM1) – Part 1: Model description and pre-industrial simulation, Geosci. Model Dev., 10, 2567–2590, https://doi.org/10.5194/gmd-10-2567-2017, 2017.
	Lee, K., Kim, T.-W., Byrne, R. H., Millero, F. J., Feely, R. A., and Liu, Y.-M.: The universal ratio of boron to chlorinity for the North Pacific and North Atlantic oceans, Geochim. Cosmochim. Acta, 74, 1801–1811, https://doi.org/10.1016/j.gca.2009.12.027, 2010.
	Lindsay, K., Bonan, G. B., Doney, S. C., Hoffman, F. M., Lawrence, D. M., Long, M. C., Mahowald, N. M., Moore, J. K., Randerson, J. T., and Thornton, P. E.: Preindustrial-Control and Twentieth-Century Carbon Cycle Experiments with the Earth System Model CESM1(BGC), J. Clim., 27, 8981–9005, https://doi.org/10.1175/JCLI-D-12-00565.1, 2014.
	Long, M. C., Moore, J. K., Lindsay, K., Levy, M. N., Doney, S. C., Luo, J. Y., Krumhardt, K. M., Letscher, R. T., Grover, M., and Sylvester, Z. T.: Simulations with the Marine Biogeochemistry Library (MARBL), J. Adv. Model. Earth Syst., https://doi.org/10.1002/essoar.10507358.1, 2021.
	Lovato, T., Peano, D., Butenschön, M., Materia, S., Iovino, D., Scoccimarro, E., Fogli, P. G., Cherchi, A., Bellucci, A., Gualdi, S., Masina, S., and Navarra, A.: CMIP6 simulations with the CMCC Earth System Model (CMCC-ESM2), J. Adv. Model. Earth Syst., n/a, e2021MS002814, https://doi.org/10.1029/2021MS002814, 2022.
	Ludwig, W., Amiotte Suchet, P., and Probst, J.-L.: River discharges of carbon to the world’s oceans: determining local inputs of alkalinity and of dissolved and particulate organic carbon, Sci. Terre Planètes Comptes Rendus Académie Sci., t. 323, 1007–1014, 1996.
	Maier-Reimer, E.: Geochemical cycles in an ocean general circulation model. Preindustrial tracer distributions, Glob. Biogeochem. Cycles, 7, 645–677, https://doi.org/10.1029/93GB01355, 1993.
	Martinez-Rey, J., Bopp, L., Gehlen, M., Tagliabue, A., and Gruber, N.: Projections of oceanic N2O emissions in the 21st century using the IPSL Earth system model, Biogeosciences, 12, 4133–4148, https://doi.org/10.5194/bg-12-4133-2015, 2015.
	Masotti, I., Belviso, S., Bopp, L., Tagliabue, A., Bucciarelli, E., Masotti, I., Belviso, S., Bopp, L., Tagliabue, A., and Bucciarelli, E.: Effects of light and phosphorus on summer DMS dynamics in subtropical waters using a global ocean biogeochemical model, Environ. Chem., 13, 379–389, https://doi.org/10.1071/EN14265, 2015.
	Mauritsen, T., Bader, J., Becker, T., Behrens, J., Bittner, M., Brokopf, R., Brovkin, V., Claussen, M., Crueger, T., Esch, M., Fast, I., Fiedler, S., Fläschner, D., Gayler, V., Giorgetta, M., Goll, D. S., Haak, H., Hagemann, S., Hedemann, C., Hohenegger, C., Ilyina, T., Jahns, T., Jimenéz‐de‐la‐Cuesta, D., Jungclaus, J., Kleinen, T., Kloster, S., Kracher, D., Kinne, S., Kleberg, D., Lasslop, G., …
	Mayorga, E., Seitzinger, S. P., Harrison, J. A., Dumont, E., Beusen, A. H. W., Bouwman, A. F., Fekete, B. M., Kroeze, C., and Van Drecht, G.: Global Nutrient Export from WaterSheds 2 (NEWS 2): Model development and implementation, Environ. Model. Softw., 25, 837–853, https://doi.org/10.1016/j.envsoft.2010.01.007, 2010.
	Middelburg, J. J., Soetaert, K., Herman, P. M. J., and Heip, C. H. R.: Denitrification in marine sediments: A model study, Glob. Biogeochem. Cycles, 10, 661–673, https://doi.org/10.1029/96GB02562, 1996.
	Nakano, H., Tsujino, H., Hirabara, M., Yasuda, T., Motoi, T., Ishii, M., and Yamanaka, G.: Uptake mechanism of anthropogenic CO2 in the Kuroshio Extension region in an ocean general circulation model, J. Oceanogr., 67, 765–783, https://doi.org/10.1007/s10872-011-0075-7, 2011.
	Neubauer, D., Ferrachat, S., Siegenthaler-Le Drian, C., Stier, P., Partridge, D. G., Tegen, I., Bey, I., Stanelle, T., Kokkola, H., and Lohmann, U.: The global aerosol–climate model ECHAM6.3–HAM2.3 – Part 2: Cloud evaluation, aerosol radiative forcing, and climate sensitivity, Geosci. Model Dev., 12, 3609–3639, https://doi.org/10.5194/gmd-12-3609-2019, 2019.
	Oke, P. R., Griffin, D. A., Schiller, A., Matear, R. J., Fiedler, R., Mansbridge, J., Lenton, A., Cahill, M., Chamberlain, M. A., and Ridgway, K.: Evaluation of a near-global eddy-resolving ocean model, Geosci. Model Dev., 6, 591–615, https://doi.org/10.5194/gmd-6-591-2013, 2013.
mocsy	Orr, J. C. and Epitalon, J.-M.: Improved routines to model the ocean carbonate system: mocsy 2.0, Geosci. Model Dev., 8, 485–499, https://doi.org/10.5194/gmd-8-485-2015, 2015.
OCMIP2	Orr, J. C., Fabry, V. J., Aumont, O., Bopp, L., Doney, S. C., Feely, R. A., Gnanadesikan, A., Gruber, N., Ishida, A., Joos, F., Key, R. M., Lindsay, K., Maier-Reimer, E., Matear, R., Monfray, P., Mouchet, A., Najjar, R. G., Plattner, G.-K., Rodgers, K. B., Sabine, C. L., Sarmiento, J. L., Schlitzer, R., Slater, R. D., Totterdell, I. J., Weirig, M.-F., Yamanaka, Y., and Yool, A.: Anthropogenic oce…
OMIP-BGC	Orr, J. C., Najjar, R. G., Aumont, O., Bopp, L., Bullister, J. L., Danabasoglu, G., Doney, S. C., Dunne, J. P., Dutay, J.-C., Graven, H., Griffies, S. M., John, J. G., Joos, F., Levin, I., Lindsay, K., Matear, R. J., McKinley, G. A., Mouchet, A., Oschlies, A., Romanou, A., Schlitzer, R., Tagliabue, A., Tanhua, T., and Yool, A.: Biogeochemical protocols and diagnostics for the CMIP6 Ocean Model In…
	Paulsen, H., Ilyina, T., Six, K. D., and Stemmler, I.: Incorporating a prognostic representation of marine nitrogen fixers into the global ocean biogeochemical model HAMOCC: PROGNOSTIC NITROGEN FIXERS IN HAMOCC, J. Adv. Model. Earth Syst., 9, 438–464, https://doi.org/10.1002/2016MS000737, 2017.
	Schwinger, J., Goris, N., Tjiputra, J. F., Kriest, I., Bentsen, M., Bethke, I., Ilicak, M., Assmann, K. M., and Heinze, C.: Evaluation of NorESM-OC (versions 1 and 1.2), the ocean carbon-cycle stand-alone configuration of the Norwegian Earth System Model (NorESM1), Geosci. Model Dev., 9, 2589–2622, https://doi.org/10.5194/gmd-9-2589-2016, 2016.
	Séférian, R., Delire, C., Decharme, B., Voldoire, A., Salas y Melia, D., Chevallier, M., Saint-Martin, D., Aumont, O., Calvet, J.-C., Carrer, D., Douville, H., Franchistéguy, L., Joetzjer, E., and Sénési, S.: Development and evaluation of CNRM Earth system model – CNRM-ESM1, Geosci. Model Dev., 9, 1423–1453, https://doi.org/10.5194/gmd-9-1423-2016, 2016.
	Séférian, R., Nabat, P., Michou, M., Saint-Martin, D., Voldoire, A., Colin, J., Decharme, B., Delire, C., Berthet, S., Chevallier, M., Sénési, S., Franchisteguy, L., Vial, J., Mallet, M., Joetzjer, E., Geoffroy, O., Guérémy, J.-F., Moine, M.-P., Msadek, R., Ribes, A., Rocher, M., Roehrig, R., Salas-y-Mélia, D., Sanchez, E., Terray, L., Valcke, S., Waldman, R., Aumont, O., Bopp, L., Deshayes, J., …
	Seitzinger, S. P., Harrison, J. A., Dumont, E., Beusen, A. H. W., and Bouwman, A. F.: Sources and delivery of carbon, nitrogen, and phosphorus to the coastal zone: An overview of Global Nutrient Export from Watersheds (NEWS) models and their application, Glob. Biogeochem. Cycles, 19, https://doi.org/10.1029/2005GB002606, 2005.
	Seland, Ø., Bentsen, M., Olivié, D., Toniazzo, T., Gjermundsen, A., Graff, L. S., Debernard, J. B., Gupta, A. K., He, Y.-C., Kirkevåg, A., Schwinger, J., Tjiputra, J., Aas, K. S., Bethke, I., Fan, Y., Griesfeller, J., Grini, A., Guo, C., Ilicak, M., Karset, I. H. H., Landgren, O., Liakka, J., Moseid, K. O., Nummelin, A., Spensberger, C., Tang, H., Zhang, Z., Heinze, C., Iversen, T., and Schulz, M…
	Sellar, A. A., Jones, C. G., Mulcahy, J. P., Tang, Y., Yool, A., Wiltshire, A., O’Connor, F. M., Stringer, M., Hill, R., Palmieri, J., Woodward, S., Mora, L., Kuhlbrodt, T., Rumbold, S. T., Kelley, D. I., Ellis, R., Johnson, C. E., Walton, J., Abraham, N. L., Andrews, M. B., Andrews, T., Archibald, A. T., Berthou, S., Burke, E., Blockley, E., Carslaw, K., Dalvi, M., Edwards, J., Folberth, G. A., …
	Steele, M., Morley, R., and Ermold, W.: PHC: A Global Ocean Hydrography with a High-Quality Arctic Ocean, J. Clim., 14, 2079–2087, https://doi.org/10.1175/1520-0442(2001)014<2079:PAGOHW>2.0.CO;2, 2001.
	Stock, C. A., Dunne, J. P., Fan, S., Ginoux, P., John, J., Krasting, J. P., Laufkötter, C., Paulot, F., and Zadeh, N.: Ocean Biogeochemistry in GFDL’s Earth System Model 4.1 and Its Response to Increasing Atmospheric CO 2, J. Adv. Model. Earth Syst., 12, https://doi.org/10.1029/2019MS002043, 2020.
	Swart, N. C., Cole, J. N. S., Kharin, V. V., Lazare, M., Scinocca, J. F., Gillett, N. P., Anstey, J., Arora, V., Christian, J. R., Hanna, S., Jiao, Y., Lee, W. G., Majaess, F., Saenko, O. A., Seiler, C., Seinen, C., Shao, A., Sigmond, M., Solheim, L., von Salzen, K., Yang, D., and Winter, B.: The Canadian Earth System Model version 5 (CanESM5.0.3), Geosci. Model Dev., 12, 4823–4873, https://doi.o…
	Tjiputra, J. F., Roelandt, C., Bentsen, M., Lawrence, D. M., Lorentzen, T., Schwinger, J., Seland, Ø., and Heinze, C.: Evaluation of the carbon cycle components in the Norwegian Earth System Model (NorESM), Geosci. Model Dev., 6, 301–325, https://doi.org/10.5194/gmd-6-301-2013, 2013.
	Tjiputra, J. F., Schwinger, J., Bentsen, M., Morée, A. L., Gao, S., Bethke, I., Heinze, C., Goris, N., Gupta, A., He, Y.-C., Olivié, D., Seland, Ø., and Schulz, M.: Ocean biogeochemistry in the Norwegian Earth System Model version 2 (NorESM2), Geosci. Model Dev., 13, 2393–2431, https://doi.org/10.5194/gmd-13-2393-2020, 2020.
	Totterdell, I. J.: Description and evaluation of the Diat-HadOCC model v1.0: the ocean biogeochemical component of HadGEM2-ES, Geosci. Model Dev., 12, 4497–4549, https://doi.org/10.5194/gmd-12-4497-2019, 2019.
	Uppström, L. R.: The boron/elflorinity ratio of deep-sea water from the Pacific Ocean, 2, 1974.
	Vichi, M., Manzini, E., Fogli, P. G., Alessandri, A., Patara, L., Scoccimarro, E., Masina, S., and Navarra, A.: Global and regional ocean carbon uptake and climate change: sensitivity to a substantial mitigation scenario, Clim. Dyn., 37, 1929–1947, https://doi.org/10.1007/s00382-011-1079-0, 2011.
	Vichi, M., Cossarini, G., Gutierrez Mlot, E., Lazzari, P., Lovato, T., Mattia, G., Masina, S., McKiver, W., Pinardi, N., Solidoro, C., and Zavatarelli, M.: The Biogeochemical Flux Model (BFM): Equation Description and User Manual. BFM version 5 (BFM-V5)., CMCC, 2013.
	Vichi, M., Lovato, T., Butenschön, M., Tedesco, L., Lazzari, P., Cossarini, G., Masina, S., Pinardi, N., Solidoro, C., and Zavatarelli, M.: Biogeochemical Flux Model (BFM): Equation Description and User Manual. BFM version 5.2, CMCC, 2020.
	Watanabe, S., Hajima, T., Sudo, K., Nagashima, T., Takemura, T., Okajima, H., Nozawa, T., Kawase, H., Abe, M., Yokohata, T., Ise, T., Sato, H., Kato, E., Takata, K., Emori, S., and Kawamiya, M.: MIROC-ESM 2010: model description and basic results of CMIP5-20c3m experiments, Geosci. Model Dev., 4, 845–872, https://doi.org/10.5194/gmd-4-845-2011, 2011.
	Yamanaka, Y. and Tajika, E.: The role of the vertical fluxes of particulate organic matter and calcite in the oceanic carbon cycle: Studies using an ocean biogeochemical general circulation model, Glob. Biogeochem. Cycles, 10, 361–382, https://doi.org/10.1029/96GB00634, 1996.
	Yool, A., Popova, E. E., and Anderson, T. R.: MEDUSA-2.0: an intermediate complexity biogeochemical model of the marine carbon cycle for climate change and ocean acidification studies, Geosci. Model Dev., 6, 1767–1811, https://doi.org/10.5194/gmd-6-1767-2013, 2013.
	Yool, A., Palmiéri, J., Jones, C. G., Sellar, A. A., de Mora, L., Kuhlbrodt, T., Popova, E. E., Mulcahy, J. P., Wiltshire, A., Rumbold, S. T., Stringer, M., Hill, R. S. R., Tang, Y., Walton, J., Blaker, A., Nurser, A. J. G., Coward, A. C., Hirschi, J., Woodward, S., Kelley, D. I., Ellis, R., and Rumbold-Jones, S.: Spin-up of UK Earth System Model 1 (UKESM1) for CMIP6, J. Adv. Model. Earth Syst., …
	Yool, A., Palmiéri, J., Jones, C. G., de Mora, L., Kuhlbrodt, T., Popova, E. E., Nurser, A. J. G., Hirschi, J., Blaker, A. T., Coward, A. C., Blockley, E. W., and Sellar, A. A.: Evaluating the physical and biogeochemical state of the global ocean component of UKESM1 in CMIP6 historical simulations, Geosci. Model Dev., 14, 3437–3472, https://doi.org/10.5194/gmd-14-3437-2021, 2021.
	Yukimoto, S., Kawai, H., Koshiro, T., Oshima, N., Yoshida, K., Urakawa, S., Tsujino, H., Deushi, M., Tanaka, T., Hosaka, M., Yabu, S., Yoshimura, H., Shindo, E., Mizuta, R., Obata, A., Adachi, Y., and Ishii, M.: The Meteorological Research Institute Earth System Model Version 2.0, MRI-ESM2.0: Description and Basic Evaluation of the Physical Component, J. Meteorol. Soc. Jpn. Ser II, 97, 931–965, h…
	Zahariev, K., Christian, J. R., and Denman, K. L.: Preindustrial, historical, and fertilization simulations using a global ocean carbon model with new parameterizations of iron limitation, calcification, and N2 fixation, Prog. Oceanogr., 77, 56–82, https://doi.org/10.1016/j.pocean.2008.01.007, 2008.
	Ziehn, T., Chamberlain, M. A., Law, R. M., Lenton, A., Bodman, R. W., Dix, M., Stevens, L., Wang, Y.-P., and Srbinovsky, J.: The Australian Earth System Model: ACCESS-ESM1.5, J. South. Hemisphere Earth Syst. Sci., 70, 193, https://doi.org/10.1071/ES19035, 2020.
	Zondervan, I.: The effects of light, macronutrients, trace metals and CO2 on the production of calcium carbonate and organic carbon in coccolithophores—A review, Deep Sea Res. Part II Top. Stud. Oceanogr., 54, 521–537, https://doi.org/10.1016/j.dsr2.2006.12.004, 2007.
